# Supplementary material
Source: Springer Nature journal article supplement (https://www.springermedizin.de/resource/supplementary/13058_2012_3596_MOESM18_ESM.pdf/9703912)

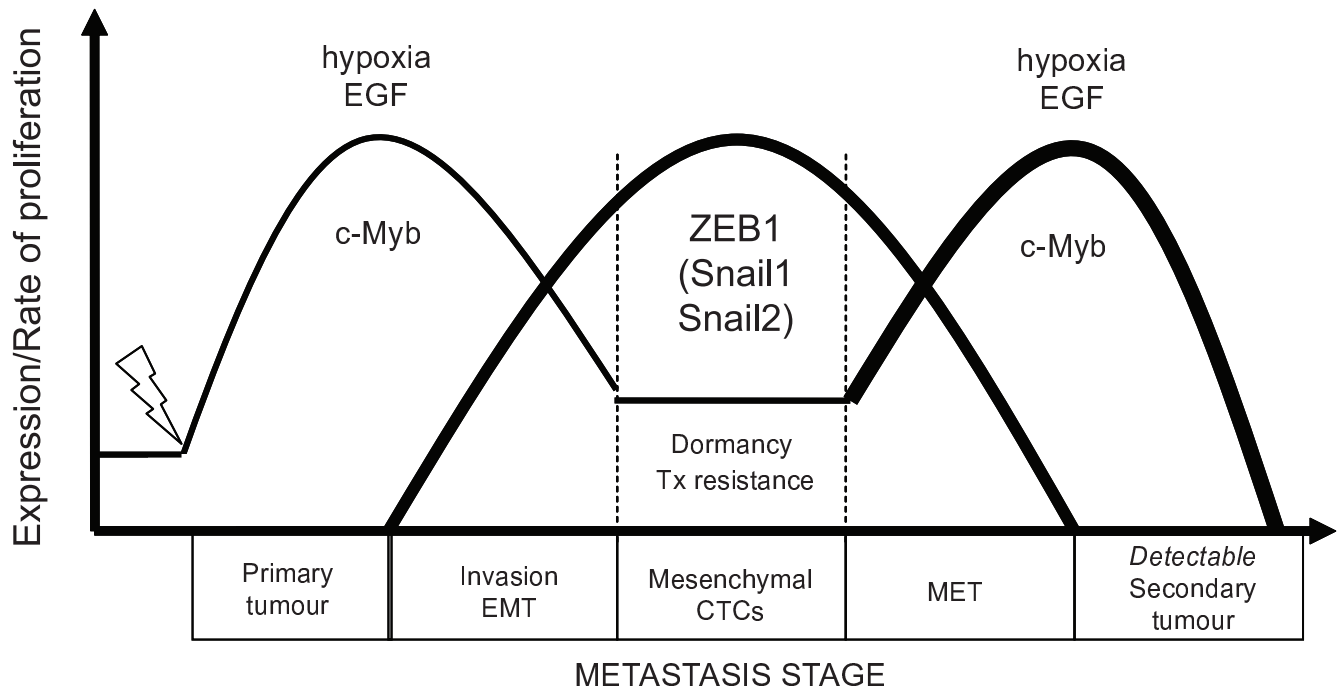

Figure 8

Supplement: MOESM18 [file 9703912]
